# Supplementary material
Source: PubMed Central journal article supplement (PMC2708952)
Supplement: jc.2009-0141_1.pdf [file jc.2009-0141_1.pdf]

**Table S1.** Relationship between plasma PCSK9 levels and selected clinical variables.

|                  |        | PCSK9 levels |           |         |
|------------------|--------|--------------|-----------|---------|
|                  |        | n            | (ng/ml)   | P-value |
| Obesity          | BMI<30 | 2,068        | 471 (226) | <0.0001 |
|                  | BMI>30 | 1,357        | 526 (288) |         |
| Diabetes         | No     | 3,050        | 486 (270) | <0.0001 |
|                  | Yes    | 401          | 558 (316) |         |
| Hypertension     | No     | 2397         | 482(264)  | 0.005   |
|                  | Yes    | 1051         | 519(297)  |         |
| CAC (Agatston U) | <10    | 1971         | 479(260)  | 0.08    |
|                  | ≥10    | 464          | 501(291)  |         |
| CRP (mg/L)       | <3     | 1756         | 466(250)  | <0.0001 |
|                  | ≥3     | 1670         | 524(293)  |         |

PCSK9 values are medians (interquartile range). Diabetes was defined by self-report, use of anti-hyperglycemic medication; or by elevated serum glucose levels (fasting > 126 mg/dL [7.0 mmol/L]; or non-fasting glucose > 200 mg/dL [11.1 mmol/L]). Hypertension was defined as systolic blood pressure > 140 mmHg, diastolic blood pressure > 90 mmHg or the use of anti-hypertensive medication. Coronary artery calcium (CAC) scores were obtained using an Imatron C-150XP EBCT scanner with 3-mm slices; duplicate scans were performed within 1 to 2 min. CAC scores were recorded as the average of the 2 scans using the Agatston method as described (27). High sensitivity assay for C-reactive protein (CRP) was performed using the Roche/Hitachi 12 System, Tina-quant assay (Roche Diagnostics, Indianapolis, Indiana). Statin users were excluded.
