# Supplementary material
Source: PubMed Central journal article supplement (PMC2708952)

Fig. S1

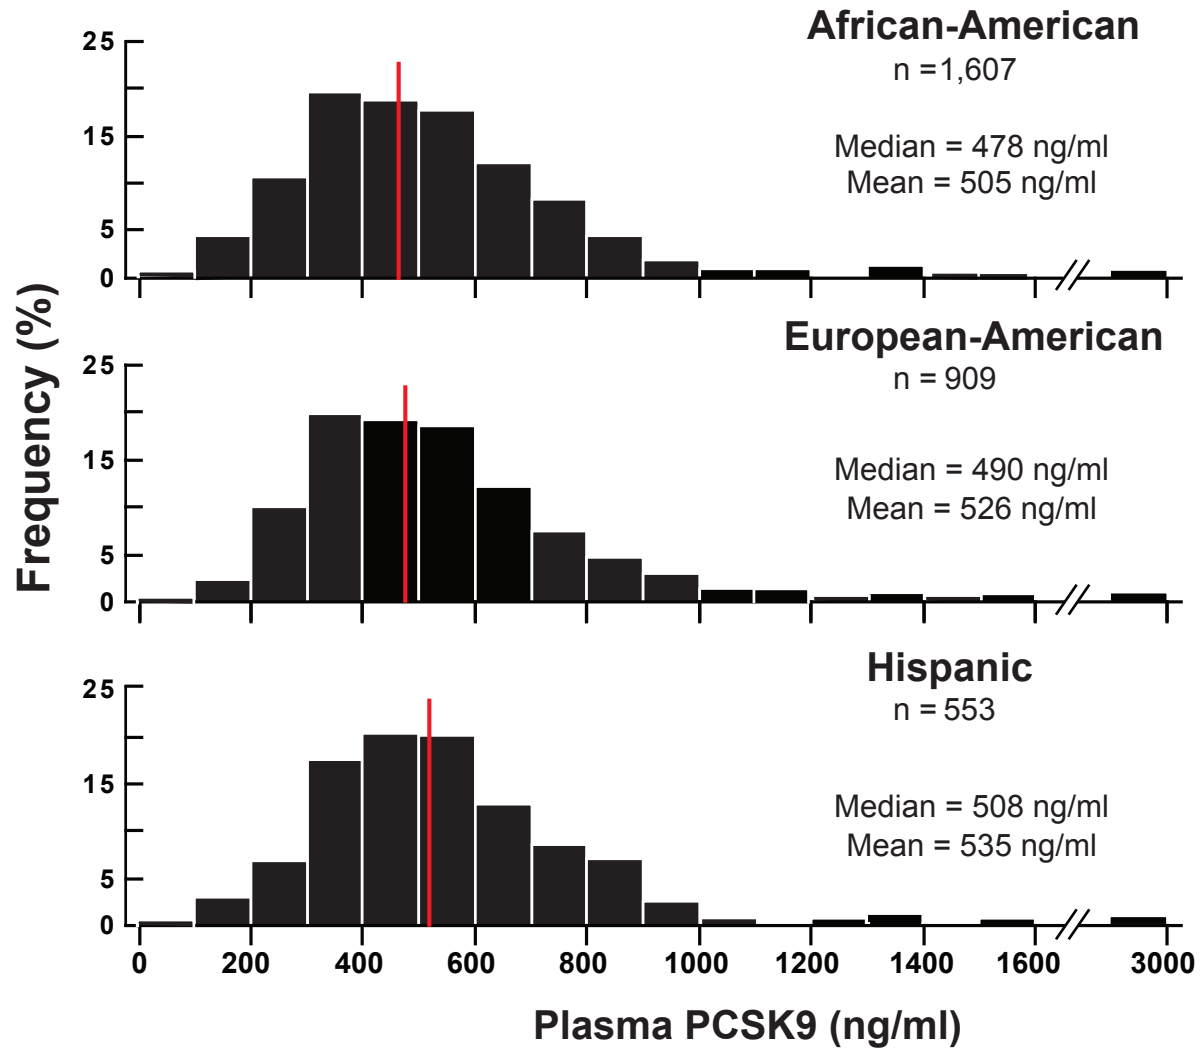

Supplement: jc.2009-0141_2.pdf [file jc.2009-0141_2.pdf]

Figure S2

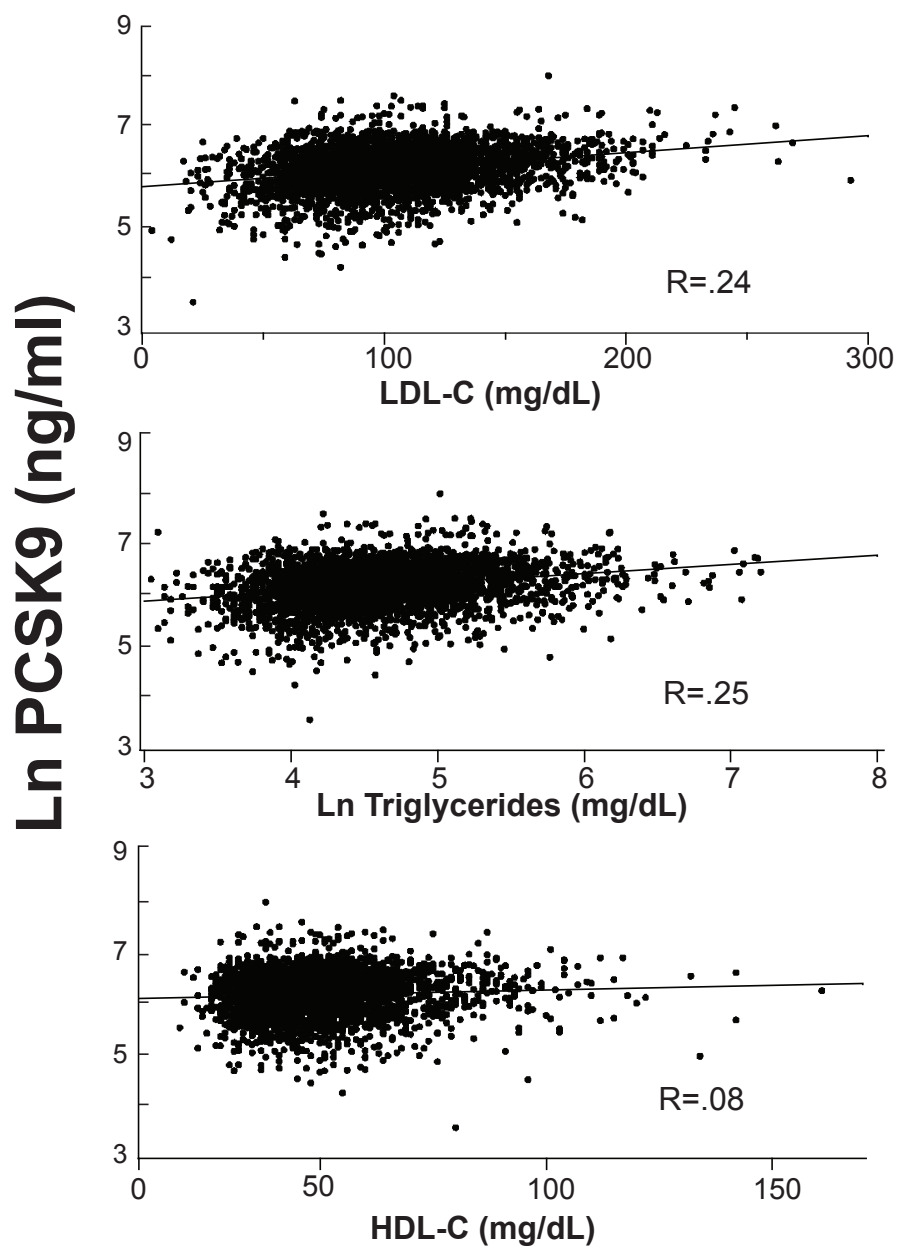

Supplement: jc.2009-0141_3.pdf [file jc.2009-0141_3.pdf]
